# Supplementary material for: Stabilizing selection on Atlantic cod supergenes through a millennium of extensive exploitation
Source: PubMed Central journal article supplement — Proc Natl Acad Sci U S A. 2022 Feb 14;119(8):e2114904119. doi: 10.1073/pnas.2114904119 (PMC8872764; doi:10.1073/pnas.2114904119), 2022-02-14
Supplement: pnas.2114904119.sapp.pdf [file pnas.2114904119.sapp.pdf]

**Supplementary materials for:**

**Stabilizing selection on Atlantic cod supergenes through a millennium of extensive exploitation**

Marte Sodeland, Sissel Jentoft, Per Erik Jorde, Morten Mattingsdal, Jon Albretsen, Alf Ring Kleiven, Ann-Elin Wårøy Synnes, Sigurd Heiberg Espeland, Esben Moland Olsen, Carl André, Nils Chr. Stenseth and Halvor Knutsen

**CONTENTS:**

**I: Supplementary Figures**

**II: Supplementary Tables**

**III: Supplementary Notes**

## I: Supplementary Figures

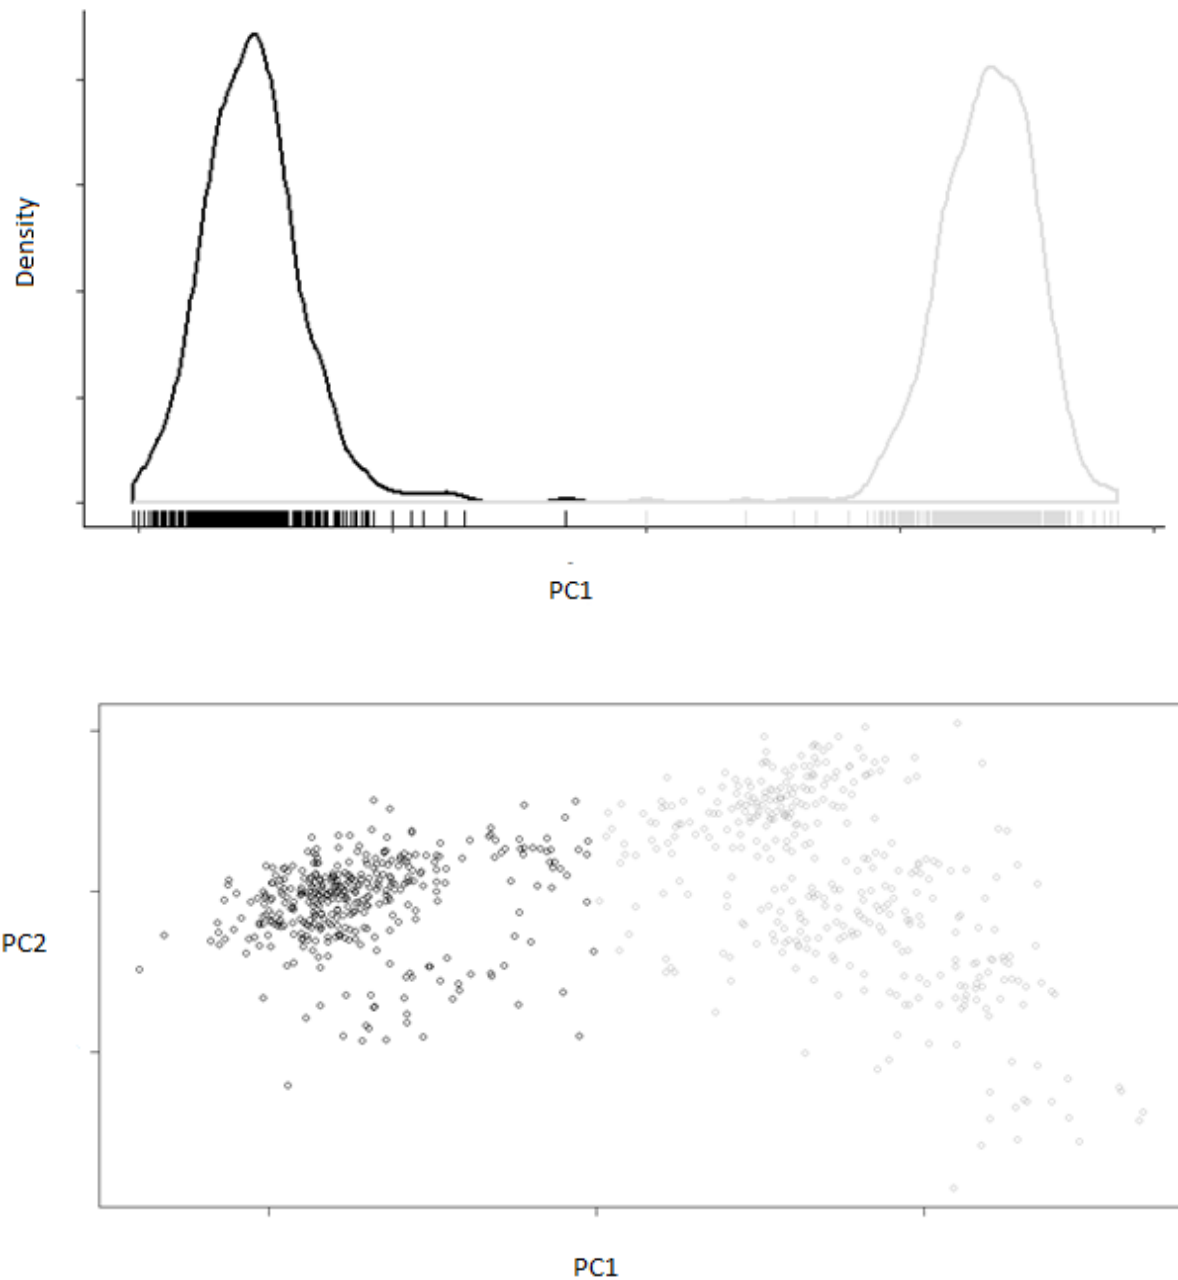

**Supplementary Figure 1:** Above: density plot on principal component 1 (PC1) for 752 Atlantic cod specimens using 6'683 SNPs from a 10k Atlantic cod SNP array. By Discriminant analysis on principle components two main clusters were identified: offshore cod (black) and coastal cod (gray). PC1 for each specimen is indicated as a bar below the density plot for the identified clusters. Below: PC1 and PC2 are plotted together, also here with coastal cod (gray) and offshore cod (black) indicated.

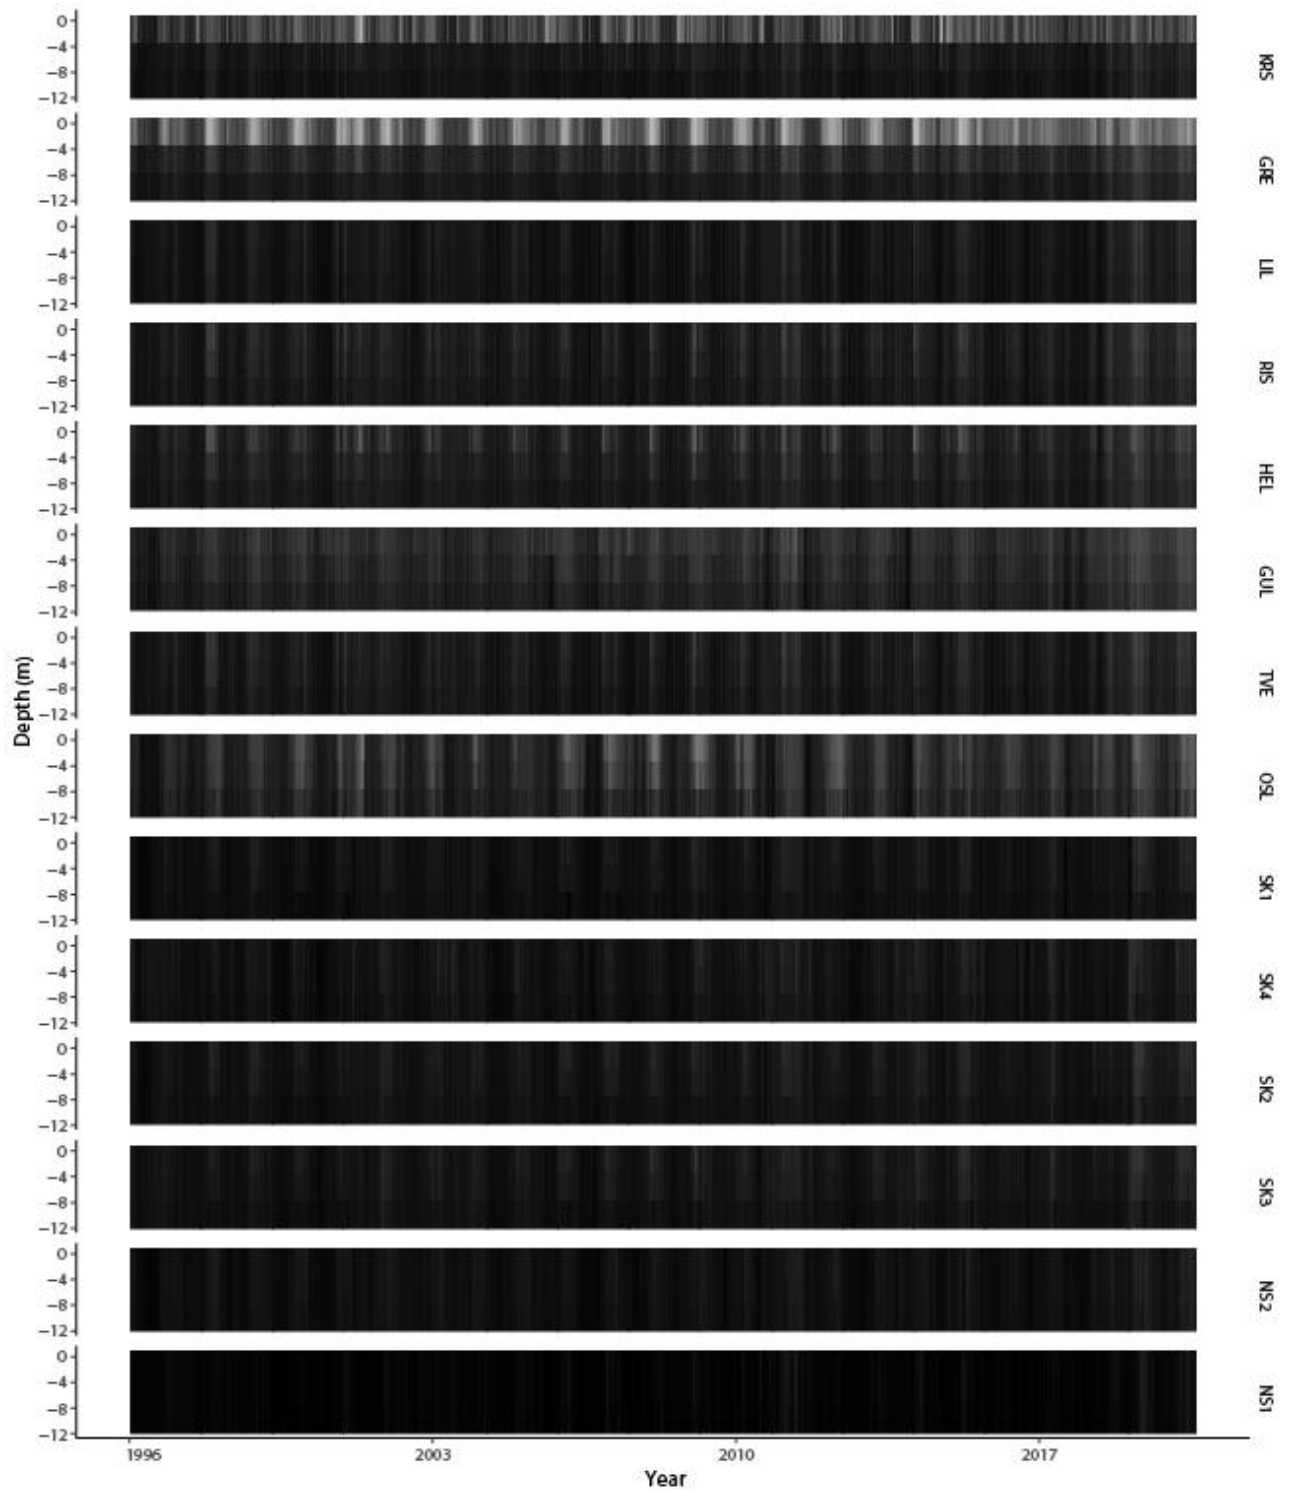

**Supplementary Figure 2:** Predicted daily salinity (lighter color is lower salinity) at three depths (0,5 and 10 below surface) over a twenty-three-year period (1996-2019) for fourteen sampling locations in Skagerrak and the North Sea. Sampling locations are ordered from bottom to top by decreasing fraction of coastal cod specimens relative to offshore cod specimens. Year is on the x-axis with one datapoint for each day, depth in meters from surface is on the y-axis.

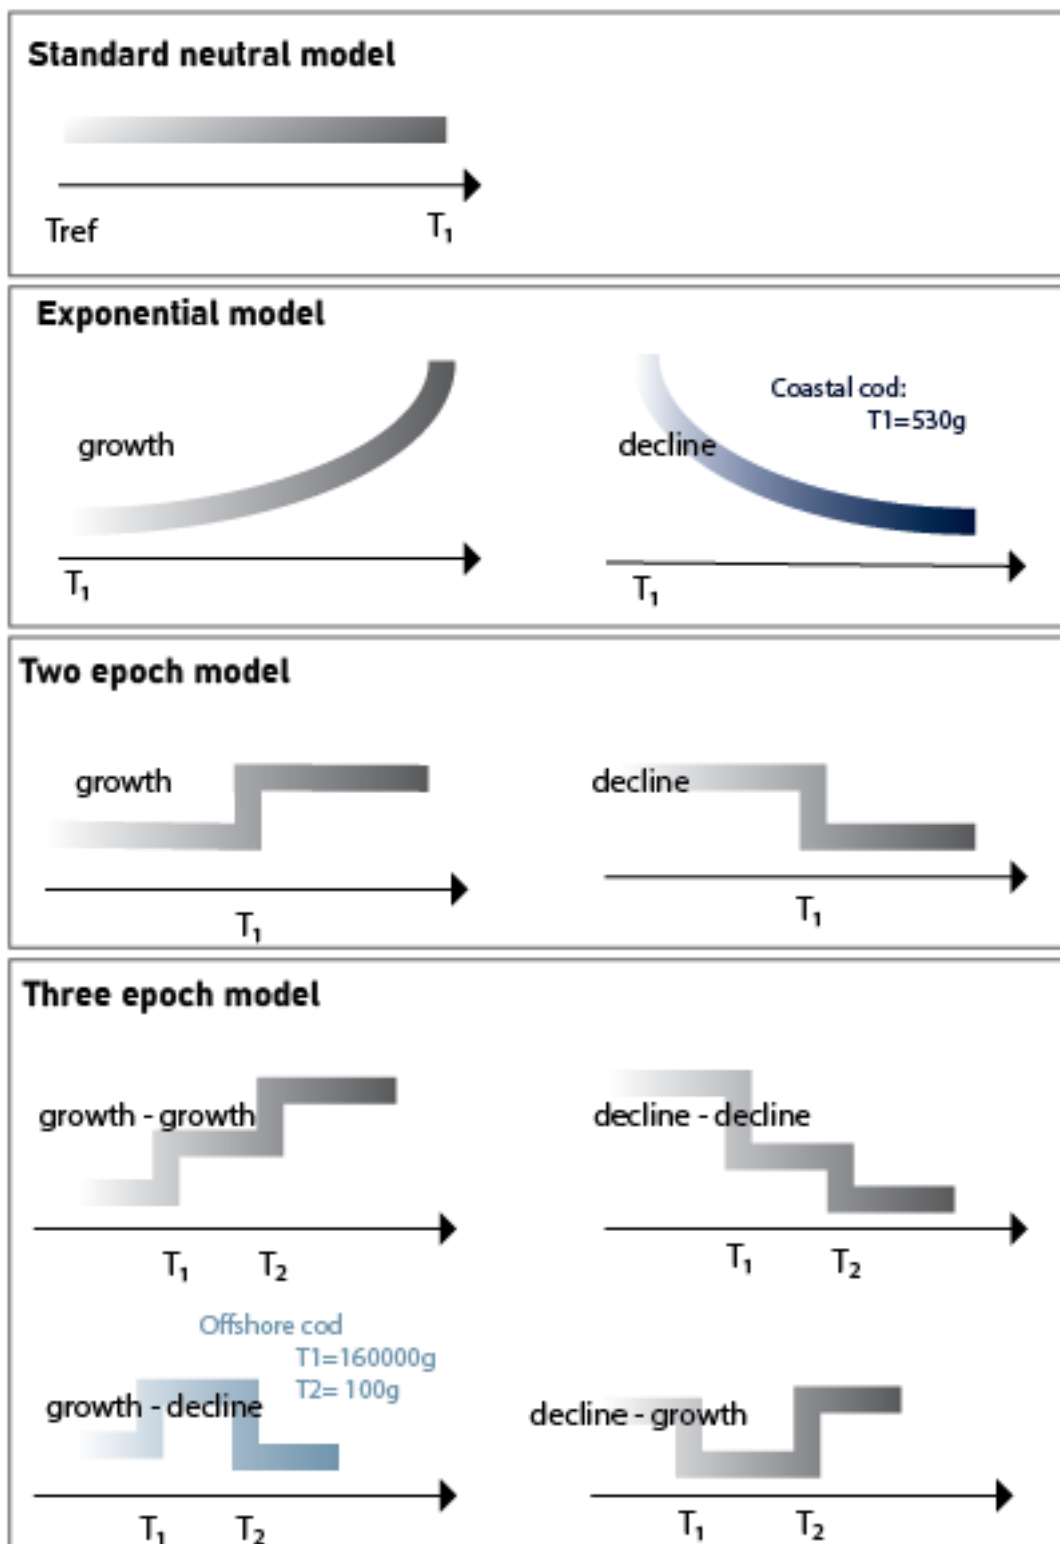

**Supplementary Figure 3:** Illustrations of four models of historic demography compared by diffusion approximation. The models were a standard neutral model (snm), an exponential model (exp), a two epoch model (two\_epoch) and a three epoch model (three\_epoch). For the latter three models alternative scenarios for positive and negative growth are illustrated. The model giving highest Aikake criterion (AIC) for Coastal cod (dark blue) and offshore cod (lighter blue) are indicated together with parameter estimates (see Supplementary Table 6 for more detailed results, and Supplementary Note 1 for python implementations).

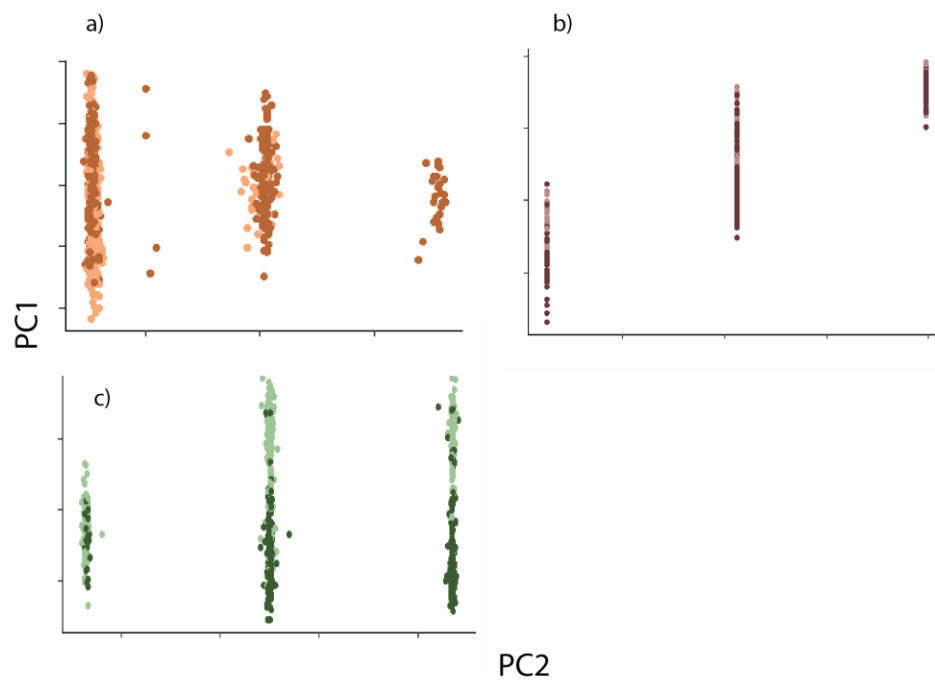

**Supplementary Figure 4:** Principal component analysis for 752 Atlantic cod specimens using a) 83 SNPs in supergene SG02 (orange), b) 187 SNPs in supergene SG07 (burgundy) and 199 SNPs in supergene SG12 (green). Principal component 1 (PC1) is shown on the x-axis and principal component 2 (PC2) is shown on the y-axis. Coastal cod specimens are shown in light color and offshore cod specimens are shown in dark color.

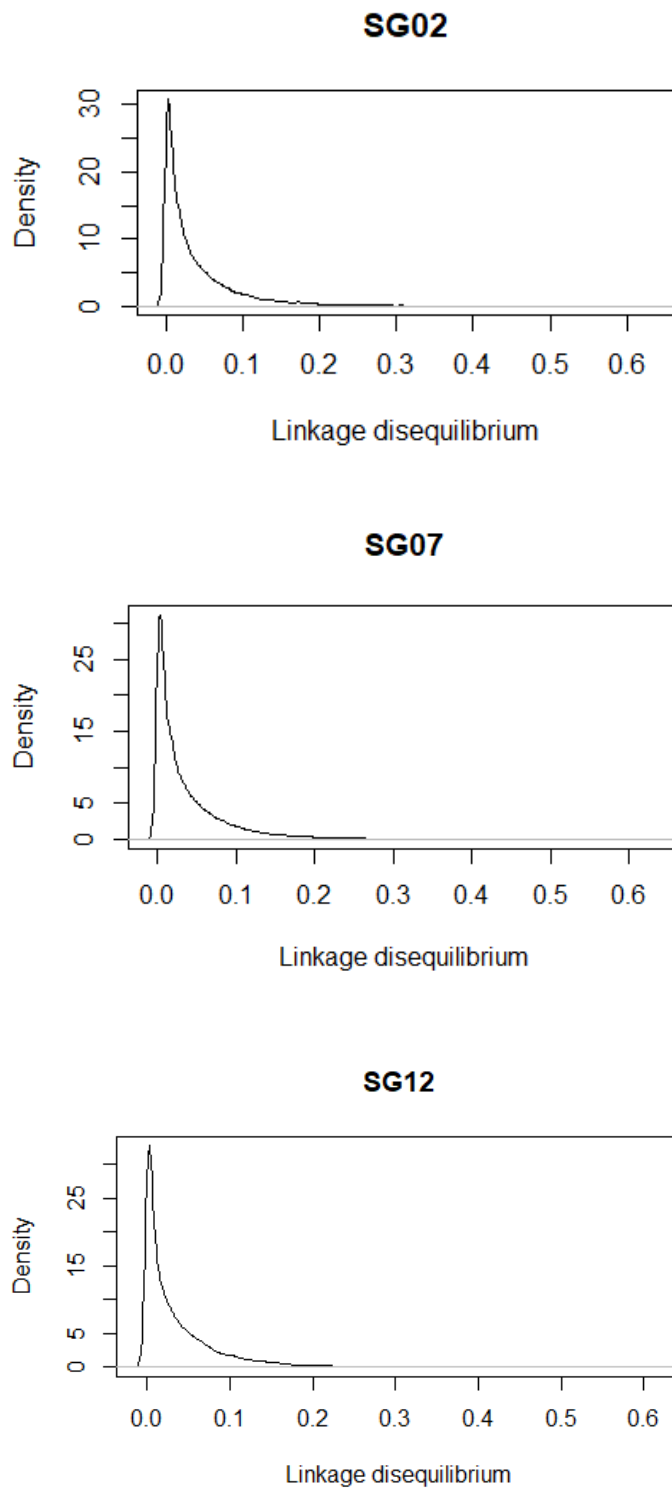

**Supplementary Figure 3:** Distribution of inter-chromosomal linkage disequilibrium between the supergenes SG02 (top), S07 (middle) and SG12 (bottom), and the 42'788 SNPs used for demographic inference.

## II: Supplementary Tables

**Supplementary Table 1:** The table present the number of specimens, sampling years, number of coastal cod, longitude and latitude for each sampling location.

| Location | Specimens (n) | Years                  | Latitude | Longitude |
|----------|---------------|------------------------|----------|-----------|
| GRE      | 19            | 2001,2012              | 59.05    | 9.65      |
| GUL      | 158           | 2005                   | 58.4     | 11.6      |
| HEL      | 29            | 2003,2010,2011         | 58.88    | 9.38      |
| KAT      | 48            | 2004                   | 56.90    | 12.15     |
| KRS      | 48            | 2000, 2005, 2008       | 58.16    | 8.06      |
| LIL      | 48            | 2004, 2005, 2010       | 58.24    | 8.38      |
| NS1      | 48            | 2002                   | 58.20    | 5.66      |
| NS2      | 48            | 2012                   | 55.60    | 5.85      |
| ORE      | 48            | 2003                   | 55.95    | 12.70     |
| OSL      | 40            | 2001                   | 59.81    | 10.56     |
| RIS      | 48            | 1997, 1998, 2004, 2005 | 58.70    | 9.25      |
| SK1      | 32            | 2012                   | 57.80    | 8.26      |
| SK2      | 32            | 2012                   | 58.05    | 8.62      |
| SK3      | 32            | 2012                   | 58.39    | 9.39      |
| SK4      | 18            | 2004                   | 58.56    | 10.83     |
| TVE      | 47            | 2004                   | 58.59    | 8.94      |

**Supplementary Table 2:** Overrepresentation analysis on gene ontologies within supergenes SG02, SG07 and SG12. For each supergene (SG) the number of annotated genes and gene ontologies (GOs) is presented. For each gene ontology overrepresented within a supergene ( $\geq 2$  fold increase), number of occurrences genome-wide excluding supergenes ( $N_{GW}$ ), number of occurrences within the supergene ( $N_{SG}$ ), fold increase and gene ontology name is given. Only gene ontologies that had 5 or more occurrences within the supergene were included in the overrepresentation analysis.

| SG   | Genes | GOs | GO Term    | $N_{GW}$ | $N_{SG}$ | Increase | GO Name                                         |
|------|-------|-----|------------|----------|----------|----------|-------------------------------------------------|
| SG02 | 145   | 194 | GO:0046982 | 96       | 12       | 11.82759 | protein heterodimerization activity             |
|      |       |     | GO:0000786 | 84       | 10       | 11.26437 | nucleosome                                      |
|      |       |     | GO:0006334 | 89       | 10       | 10.63154 | nucleosome assembly                             |
| SG07 | 172   | 214 | GO:0007275 | 146      | 6        | 3.165393 | multicellular organism development              |
|      |       |     | GO:0005216 | 186      | 6        | 2.484663 | ion channel activity                            |
|      |       |     | GO:0006811 | 228      | 7        | 2.364789 | ion transport                                   |
|      |       |     | GO:0005215 | 186      | 5        | 2.070553 | transporter activity                            |
| SG12 | 293   | 329 | GO:0005230 | 60       | 6        | 4.621474 | extracellular ligand-gated ion channel activity |
|      |       |     | GO:0030170 | 53       | 5        | 4.359881 | pyridoxal phosphate binding                     |
|      |       |     | GO:0004713 | 75       | 5        | 3.080982 | protein tyrosine kinase activity                |

**Supplementary Table 3:** Frequencies of supergene genotypes I/I, I/II and II/II in the 41 re-sequenced specimens from locations LIL (n=11), RIS (n=8) and NS1 (n=22) and from all genotyped specimens from the same locations (n=48 for all three locations).

|           |     | SG02 |      |       | SG07 |      |       | SG12 |      |       |
|-----------|-----|------|------|-------|------|------|-------|------|------|-------|
|           |     | I/I  | I/II | II/II | I/I  | I/II | II/II | I/I  | I/II | II/II |
| Sequenced | LIL | 0.27 | 0.45 | 0.27  | 0.14 | 0.35 | 0.50  | 0.27 | 0.36 | 0.36  |
|           | RIS | 0.00 | 0.25 | 0.75  | 0.13 | 0.13 | 0.75  | 0.00 | 0.25 | 0.75  |
|           | NS1 | 0.00 | 0.18 | 0.82  | 0.00 | 0.27 | 0.73  | 0.36 | 0.50 | 0.14  |
| Genotyped | LIL | 0.15 | 0.50 | 0.35  | 0.06 | 0.48 | 0.46  | 0.06 | 0.29 | 0.65  |
|           | RIS | 0.04 | 0.31 | 0.65  | 0.08 | 0.34 | 0.58  | 0.04 | 0.31 | 0.65  |
|           | NS1 | 0.00 | 0.12 | 0.88  | 0.00 | 0.29 | 0.71  | 0.33 | 0.52 | 0.15  |

**Supplementary Table 4:** Four single-population demographic models were compared by diffusion approximation as implemented in the DADI python module. For each model and ecotype the Aikake criterion (AIC) and population (Theta) are presented. The model giving the best fit for each ecotype is indicated in *italic*, and parameter estimates are presented.

| Model              | Ecotype         | AIC            | Parameters                                                  |
|--------------------|-----------------|----------------|-------------------------------------------------------------|
| snm                | Coastal         | 8985.34        |                                                             |
| <i>exp</i>         | <i>Coastal</i>  | <i>1127.96</i> | <i>nref=26105, nu=261, T=527g</i>                           |
| two_epoch          | Coastal         | 1191.24        |                                                             |
| three_epoch        | Coastal         | 1149.26        |                                                             |
| snm                | Offshore        | 14993.4        |                                                             |
| exp                | Offshore        | 3380.36        |                                                             |
| two_epoch          | Offshore        | 3581.42        |                                                             |
| <i>three_epoch</i> | <i>Offshore</i> | <i>3357.84</i> | <i>nref=2903, nu1=30044, nu2=174, T1=161702g, , T2=106g</i> |

### III: Supplementary Notes

**Supplementary Note 1:** Python code (blue) used to implement the standard neutral model (snm), the exponential development model (exp), the two-epoch development model (two\_epoch) and the three-epoch development model (three\_epoch).

```
def snm(notused, ns, pts):
```

```
    xx = Numerics.default_grid(pts)
    phi = PhiManip.phi_1D(xx)
    fs = Spectrum.from_phi(phi, ns, (xx,))
    return fs
```

```
def exp(params, ns, pts):
```

```
    nu,T = params
    xx = Numerics.default_grid(pts)
    phi = PhiManip.phi_1D(xx)
    nu_func = lambda t: numpy.exp(numpy.log(nu) * t/T)
    phi = Integration.one_pop(phi, xx, T, nu_func)
    fs = Spectrum.from_phi(phi, ns, (xx,))
    return fs
```

```
def two_epoch(params, ns, pts):
```

```
    nu,T = params
    xx = Numerics.default_grid(pts)
    phi = PhiManip.phi_1D(xx)
    phi = Integration.one_pop(phi, xx, T, nu)
    fs = Spectrum.from_phi(phi, ns, (xx,))
    return fs
```

```
def three_epoch(params, ns, pts):
```

```
    nu1,nu2,TB,TF = params
    xx = Numerics.default_grid(pts)
    phi = PhiManip.phi_1D(xx)
    phi = Integration.one_pop(phi, xx, T1, nu1)
    phi = Integration.one_pop(phi, xx, T2, nu2)
    fs = Spectrum.from_phi(phi, ns, (xx,))
    return fs
```
